# Supplementary material for: Syntheses, structures, photoluminescence and magnetic properties of four new metal–organic frameworks based on imidazoleligands and aromatic polycarboxylate acids
Source: Royal Society of Chemistry journal article supplement (doi:10.1039/c0ce00219d), 2010-10-12
Supplement: c0ce00219d.pdf [file c0ce00219d.pdf]

## Supporting Information

### Syntheses, structures, photoluminescence, and magnetic properties of four new metal-organic frameworks based on imidazole ligands and aromatic polycarboxylate acids

**Table S1 Selected Bond Distances (Å) and Angles (deg) for complexes**

| Complex 1     |            |                |            |
|---------------|------------|----------------|------------|
| Cu1—O2        | 1.989(2)   | Cu1—N1         | 1.991(3)   |
| Cu1—O1_a      | 1.999(3)   | Cu1—N5_b       | 1.999(3)   |
| Cu1—O3        | 2.349(3)   | Cu1—O6_c       | 2.394(3)   |
| Cu2—N10_b     | 1.957(3)   | Cu2—N6         | 1.979(4)   |
| Cu2—O4        | 1.985(3)   | Cu2—O5         | 1.988(3)   |
|               |            |                |            |
| O2—Cu1—N1     | 87.64(13)  | O2—Cu1—O1_a    | 179.29(11) |
| N1—Cu1—O1_a   | 91.66(13)  | O2—Cu1—N5_b    | 89.69(13)  |
| N1—Cu1—N5_b   | 176.46(14) | O1_a—Cu1—N5_b  | 91.02(13)  |
| O2—Cu1—O3     | 91.10(11)  | N1—Cu1—O3      | 90.19(13)  |
| O1—Cu1—O3_a   | 88.82(11)  | N5—Cu1—O3_b    | 92.19(13)  |
| O2—Cu1—O6_c   | 95.55(11)  | N1—Cu1—O6_c    | 89.66(12)  |
| O1_a—Cu1—O6_c | 84.53(11)  | N5_b—Cu1—O6_c  | 88.27(12)  |
| O3—Cu1—O6_c   | 173.34(10) | N10—Cu2—N6_b   | 171.00(15) |
| N10—Cu2—O4    | 93.05(14)  | N6—Cu2—O4      | 90.18(13)  |
| N10—Cu2—O5_b  | 87.80(14)  | N6—Cu2—O5      | 90.15(14)  |
| O4—Cu2—O5     | 172.13(12) | N10_b—Cu2—O4_d | 94.48(13)  |
| N6—Cu2—O4_d   | 94.41(12)  | O4—Cu2—O4_d    | 78.13(11)  |
| O5—Cu2—O4_d   | 94.00(11)  | C3—N1—Cu1      | 124.8(3)   |
| C1—N1—Cu1     | 128.9(3)   | N11—O1—Cu1     | 124.3(2)   |
| N11—O2—Cu1_c  | 122.6(2)   | N12—O3—Cu1     | 126.5(2)   |
| N12—O4—Cu2    | 117.2(2)   | Cu2—O4—Cu2_d   | 101.87(11) |
|               |            |                |            |
| Complex 2     |            |                |            |
| N1—Cd1        | 2.222(3)   | Cd1—O2         | 2.205(2)   |
|               |            |                |            |
| O2—Cd1—N1     | 111.88(9)  | O2—Cd1—N1      | 111.88(9)  |
| N1—Cd1—N1_a   | 94.28(14)  | C3—N1—Cd1      | 122.8(2)   |
| C1—N1—Cd1     | 130.7(2)   | C10—O2—Cd1     | 102.32(19) |
| O2—Cd1—O2_a   | 88.78(11)  |                |            |
| Complex 3     |            |                |            |
| Co1—O1        | 2.078(3)   | Co1—N3_a       | 2.150(4)   |

|                  |            |               |            |
|------------------|------------|---------------|------------|
| Co1—N1           | 2.155(4)   | Co2—N5        | 2.091(4)   |
| Co2—O3           | 2.123(3)   | Co2—O5        | 2.124(4)   |
| O1—Co1—O1_b      | 180.00     | O1—Co1—N3_a   | 93.02(15)  |
| N3_a—Co1—N3_c    | 180.00(19) | O1—Co1—N1     | 92.62(15)  |
| N3—Co1—N1_a      | 96.85(17)  | N1—Co1—N1_b   | 180.0(19)  |
| N5—Co2—N5_d      | 180.000    | N5—Co2—O3     | 93.41(14)  |
| O3—Co2—O3_d      | 180.000(1) | O3—Co2—O5     | 93.41(14)  |
| N5—Co2—O5_d      | 90.44(16)  | O5—Co2—O5     | 180.0      |
| C18—N1—Co1       | 122.3(4)   | C19—N1—Co1    | 129.4(4)   |
| C29—N3—Co1_e     | 126.5(4)   | C27—N3—Co1_e  | 128.1(4)   |
| C9—N5—Co2        | 122.7(4)   | C11—N5—Co2    | 132.5(4)   |
| C1—O1—Co1        | 138.5(4)   | C8—O3—Co2     | 126.4(4)   |
| <b>Complex 4</b> |            |               |            |
| Zn1—N1           | 1.991(2)   | Zn1—N3        | 1.986(3)   |
| Zn1—O3_a         | 2.0080(2)  | Zn1—O6        | 1.970(2)   |
| O6- Zn1 -N3      | 109.03(12) | O6- Zn1- N1   | 110.33(12) |
| N3 -Zn1- N1      | 117.12(12) | O6- Zn1 -O3_b | 102.79(11) |
| N3- Zn1- O3_b    | 105.02(12) | N1 -Zn1 -O3_b | 111.48(12) |
| C3- Zn1-N1       | 127.9(3)   | C1-Zn1-N1     | 126.4(3)   |
| C15- Zn1-O6      | 110.1(2)   | C5- Zn1-N3    | 126.0(3)   |
| C23 -Zn1-O3_a    | 107.8(2)   |               |            |

$a = -x + 1, y - 1/2, -z + 3/2$ ;  $b = x + 1, y, z$ ;  $c = -x + 1, y + 1/2, -z + 3/2$ ;  $d = -x + 1, -y + 1, -z + 2$  ( compound 1)

$a = x, -y + 3/2, -z + 1/2$ . (compound 2)

$a = x + 1, y - 2, z$ ;  $b = -x + 1, -y, -z + 1$ ;  $c = -x, -y + 2, z + 1$ ;  $d = -x + 1, -y + 2, -z$ ;  $e = x - 1, y + 2, z$ .( compound 3)

$a = x - 1, y, z$ ;  $b = x + 1, y, z$ .( compound 4)

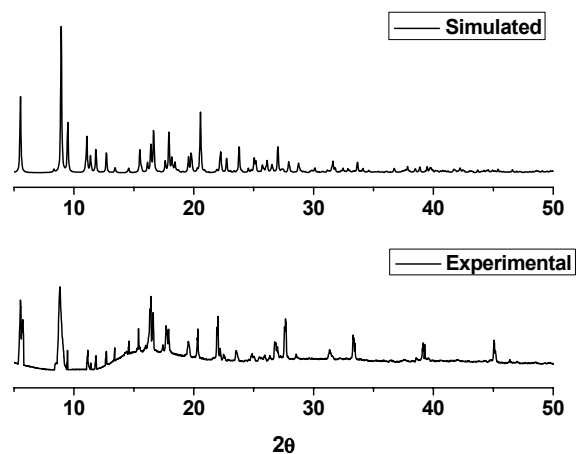

**Figure S1.** Experimental (bottom) and simulated (top) powder X-ray diffraction patterns of compound **1** at 293K.

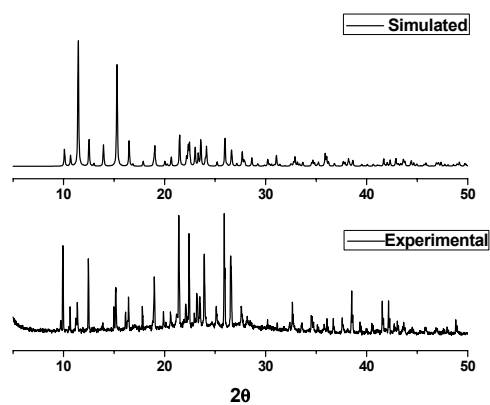

**Figure S2.** Experimental (bottom) and simulated (top) powder X-ray diffraction patterns of compound **2** at 293K.

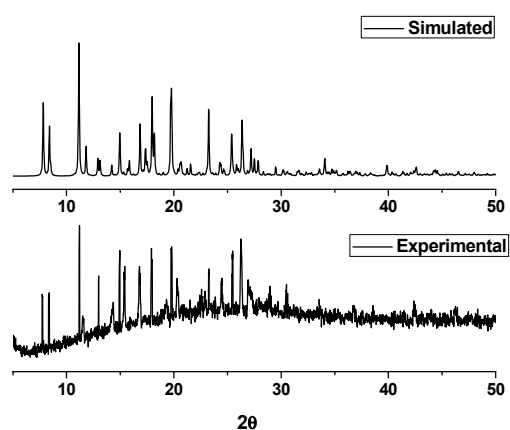

**Figure S3.** Experimental (bottom) and simulated (top) powder X-ray diffraction patterns of compound **3** at 293K.

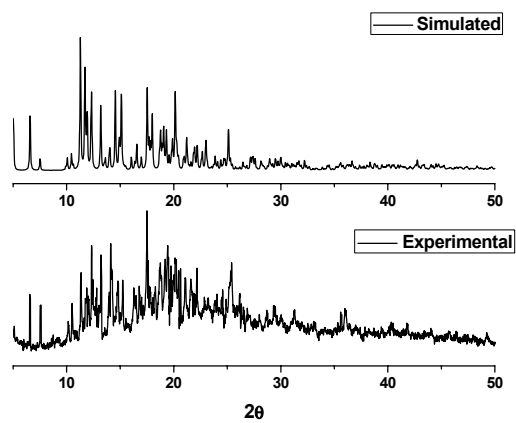

**Figure S4.** Experimental (bottom) and simulated (top) powder X-ray diffraction patterns of compound **4** at 293K.
